# Supplementary material for: Ruminococcaceae_UCG-013 Promotes Obesity Resistance in Mice
Source: MDPI journal article supplement (doi:10.3390/biomedicines10123272), 2022-12-16
Supplement: s1 [file s1]

## Supplementary Materials

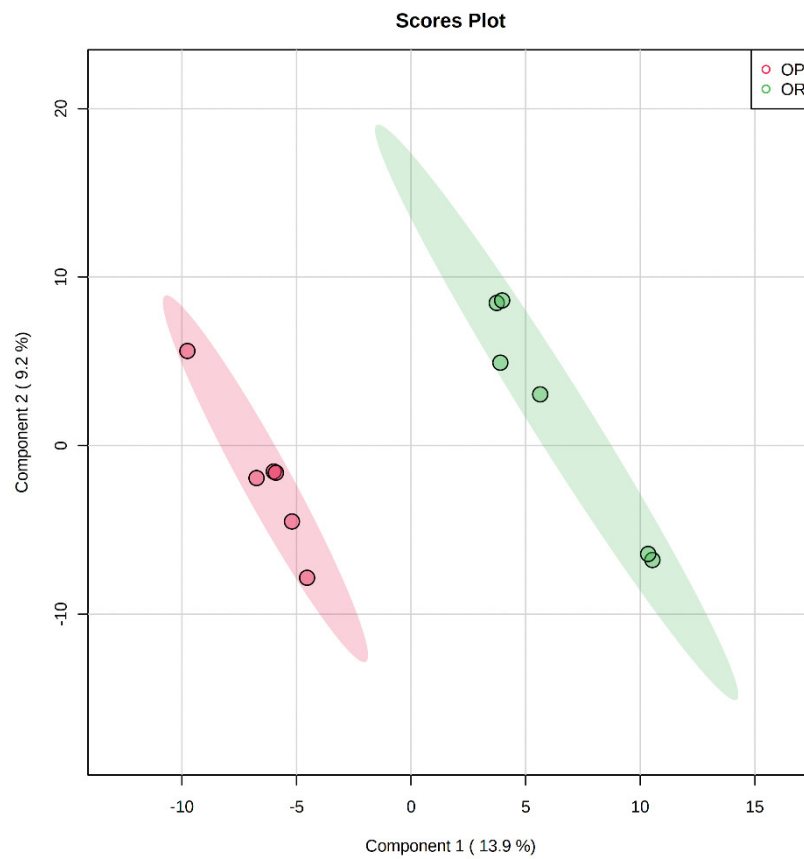

**Figure S1.** Partial least-square discriminant analysis (PLS-DA) scores plot of OTU level showing the groupings of OP (red) group and OR (green).

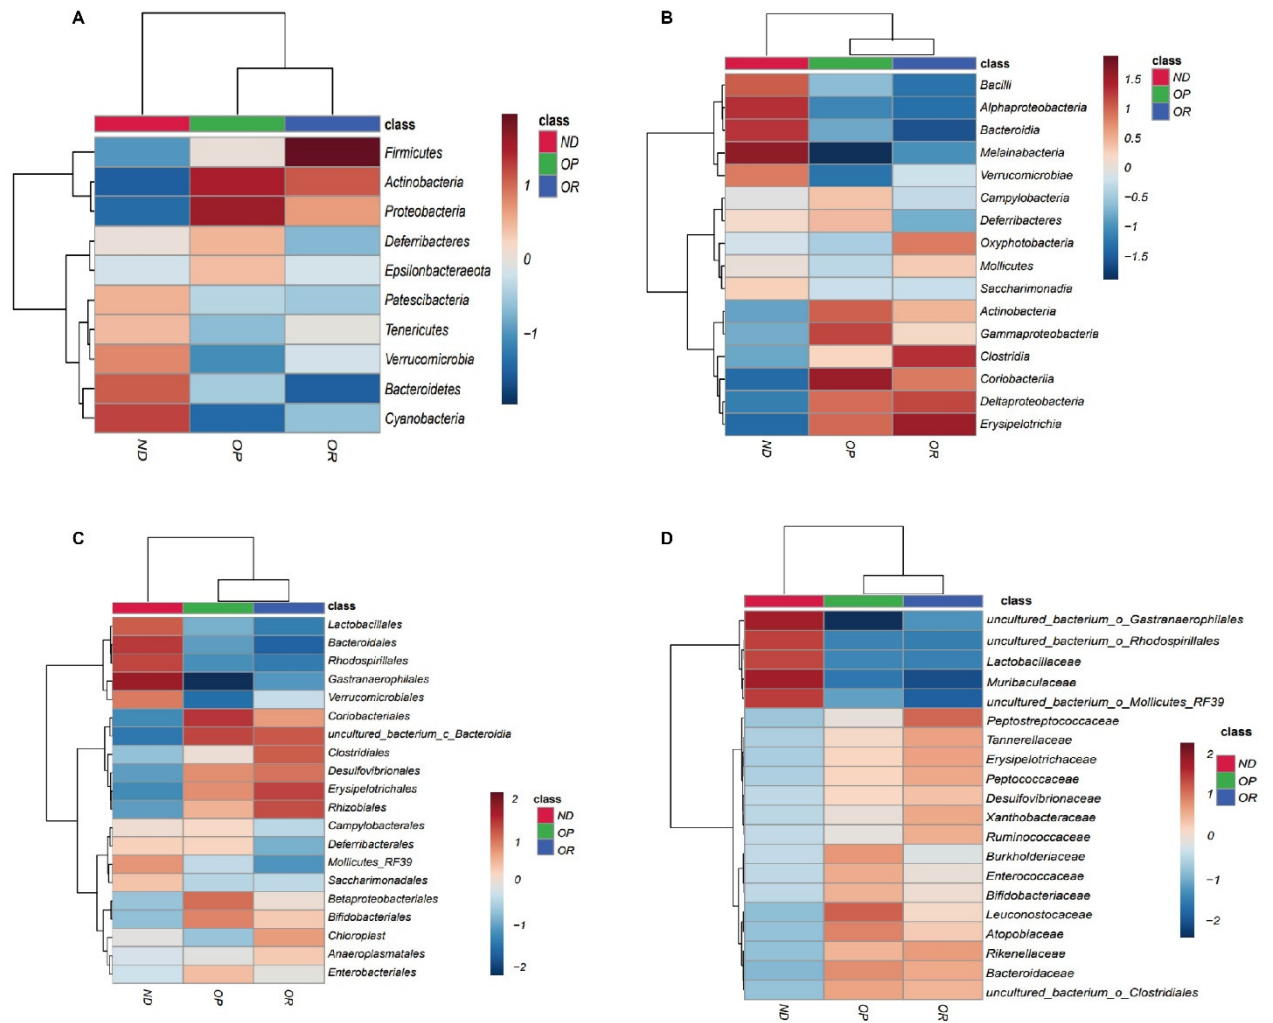

**Figure S2.** Comparison of the relative abundance of bacterial groups in the OP versus OR groups. (A) Heatmap of the Phylum level among different groups. (B) Heatmap of the Class level among different groups. (C) Heatmap of the Order level among different groups (only the top 20 taxa with the largest mean relative abundance are shown) (D) Heatmap of the Family level among different groups (only the top 20 taxa with the largest mean relative abundance are shown).

**Table S1.** Ingredients list for high fat feeds.

| Product                             | High-Fat Diet(D12492) |       |
|-------------------------------------|-----------------------|-------|
|                                     | gm%                   | kcal% |
| Protein                             | 26.2                  | 20    |
| Carbohydrate                        | 26.3                  | 20    |
| Fat                                 | 34.9                  | 60    |
| Total (kcal/gm)                     | 5.24                  |       |
| ingredients                         | gm                    | kcal  |
| Casein,80 Mesh                      | 200                   | 800   |
| L-Cystine                           | 3                     | 12    |
| Corn Starch                         | 0                     | 0     |
| Maltodextrin 10                     | 125                   | 500   |
| Sucrose                             | 68.8                  | 275.2 |
| Cellulose,BW 200                    | 50                    | 0     |
| Soybean Oil                         | 25                    | 225   |
| Lard*                               | 245                   | 2205  |
| Mineral Mix,S10026                  | 10                    | 0     |
| Dicalcium Phosphate                 | 13                    | 0     |
| Calcium carbonate                   | 5.5                   | 0     |
| Potassium Citrate, H <sub>2</sub> O | 16.5                  | 0     |
| Vitamin Mix,V10001                  | 10                    | 40    |
| Choline Bitartrate                  | 2                     | 0     |
| FD& C Blue Dye#1                    | 0.05                  | 0     |
| Total                               | 773.85                | 4057  |

\*Typical analysis of cholesterol in lard=0.95mg/gram

Cholesterol(mg)/4057kcal=232.8

Cholesterol(mg)/kg=300.8

**Table S2** Primer sequences

| Target Bacterial        | Sequence (5'-3')                                 | Sequence Length |
|-------------------------|--------------------------------------------------|-----------------|
| Ruminococcaceae_UCG-013 | F: TGGAGCAAACCCCCAAAAA<br>R: TACAAGGCCCGGGAACGTA | 122             |
